# Supplementary material for: Protective Effect of Dl-3n-butylphthalide on Learning and Memory Impairment Induced by Chronic Intermittent Hypoxia-Hypercapnia Exposure
Source: PubMed Central journal article supplement — Sci Rep. 2014 Jul 3;4:5555. doi: 10.1038/srep05555 (PMC4080197; doi:10.1038/srep05555), 2014-07-03

## **Protective Effect of DL-3n-butylphthalide on Learning and Memory Impairment Induced by Chronic Intermittent Hypoxia-Hypercapnia Exposure**

Jing-jing Min<sup>a,c</sup>, Xin-long Huo<sup>a,c</sup>, ling-yun Xiang<sup>a</sup>, Yan-qing Qin<sup>a</sup>, Ke-qin Chai<sup>a</sup>, Bin Wu<sup>b</sup>, Lu Jin<sup>a</sup>, Xiao-tong Wang<sup>a,\*</sup>

<sup>a</sup>The Center of Neurology and Rehabilitation, The Second Affiliated Hospital of Wenzhou Medical University, Wenzhou 325027, China.

<sup>b</sup> Wenzhou Medical University, Wenzhou 325027, China.

<sup>c</sup>These authors contributed equally to this work.

Corresponding author: Prof. Xiao-tong Wang. Tel.:+86 13706786183; Fax: +86 576 86666520.

E-mail address:wangxt22@163.com

Address:109 *Xueyuan* Road, *Wenzhou*, *Zhejiang*; Postcode: 325027, Center of neurology, the second affiliated hospital of *Wenzhou* Medical University, *Wenzhou*, China.

We use a single membrane instead of the entire membrane to cover each target protein respectively.

The full-length gel images for Fig2, Fig. 2A, Fig. 3B and Fig. 5A

**Fig.2**

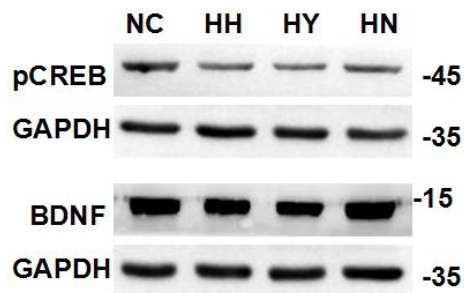

**Fig.3A**

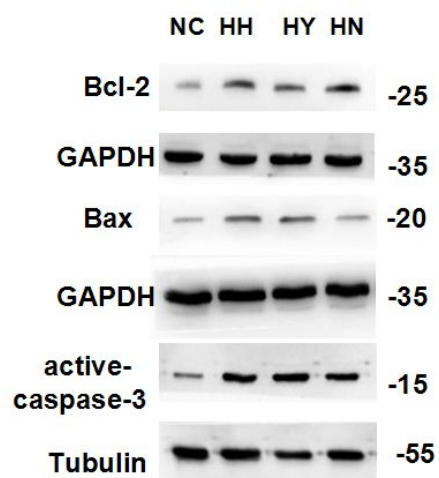

**Fig.4B**

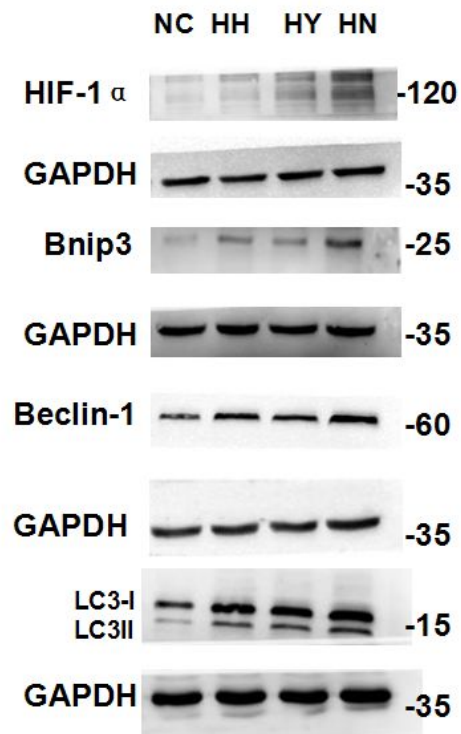

**Fig.6A.**(The molecular weight of PGC-1  $\alpha$  and Tfam differ greatly, so we cut the two from the same gel and incubated with respective primary antibodies.)

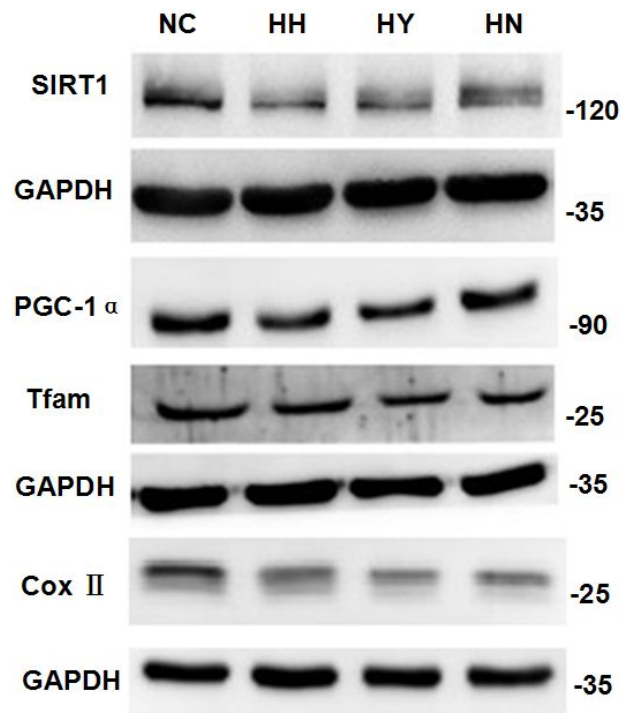

Supplement: srep05555-s1.pdf [file srep05555-s1.pdf]
